# Supplementary material for: Discovery of novel astrovirus and calicivirus identified in ruddy turnstones in Brazil
Source: PubMed Central journal article supplement (PMC6447618; doi:10.1038/s41598-019-42110-3), 2019-04-03

**Title:** Discovery of novel astrovirus and calicivirus identified in ruddy turnstones in Brazil

**Running Title:** Novel astrovirus and calicivirus in migratory birds

**Authors:** William Marciel de Souza<sup>1,2,3,¶,\*</sup>, Marcílio Jorge Fumagalli<sup>1,¶</sup>, Jansen de Araujo<sup>4</sup>, Tatiana Ometto<sup>4</sup>, Sejal Modha<sup>2</sup>, Luciano Matsumiya Thomazelli<sup>4</sup>, Edison Luís Durigon<sup>4</sup>, Pablo Ramiro Murcia<sup>2</sup> and Luiz Tadeu Moraes Figueiredo<sup>1</sup>.

**Affiliations:**

<sup>1</sup>Virology Research Center, School of Medicine of Ribeirão Preto of University of São Paulo, Ribeirão Preto, 14049-900, SP, Brazil.

<sup>2</sup>MRC-University of Glasgow Centre for Virus Research, Glasgow, G61 1QH, Scotland, United Kingdom.

<sup>3</sup>Department of Genetics, Evolution and Bioagents, Institute of Biology, University of Campinas, 13083-862, Campinas, São Paulo, Brazil.

<sup>4</sup> Institute of Biomedical Sciences, University of São Paulo, São Paulo, 05508-900, SP, Brazil.

¶ These authors contributed equally to this work.

**\*Corresponding author:** wmarciel@usp.br or wmarciel@hotmail.com.

## Supplementary Table and Figures

**Supplementary Table 1.** Distribution of reads assembled by MetaViC per organism.

| ID | Eukaryote  | Bacteria   | Viruses   | Archaea   | Unassigned |
|----|------------|------------|-----------|-----------|------------|
| 1  | 47% (2136) | 52% (2381) | 0.5% (22) | 0.4% (20) | 0.3% (14)  |
| 2  | 44% (210)  | 43% (202)  | 10% (46)  | -         | 1% (6)     |
| 3  | 64% (109)  | 29% (49)   | 5% (9)    | -         | 1% (2)     |
| 4  | 68% (102)  | 23% (34)   | 9% (13)   | -         | -          |
| 40 | 53% (85)   | 28% (44)   | 17%(27)   | -         | -          |
| 41 | 51% (201)  | 43% (171)  | 3% (13)   | -         | 1% (5)     |
| 42 | 52% (98)   | 30% (57)   | 16% (30)  | -         | 1% (2)     |
| 43 | 55% (68)   | 33% (41)   | 9 % (11)  | -         | -          |
| 44 | 53% (1372) | 42% (1070) | 5% (125)  | -         | -          |
| 45 | 80% (1071) | 17% (228)  | 2% (25)   | -         | 0.5% (6)   |
| 46 | 70% (234)  | 26% (86)   | 3% (9)    | -         | -          |
| 47 | 79% (4724) | 21% (1243) | 0.5% (19) | -         | -          |
| 48 | 48% (756)  | 47% (739)  | 2% (28)   | -         | -          |
| 49 | 64% (61)   | 29% (28)   | 7% (7)    | -         | -          |

Numbers of reads are showed between parentheses.

**Supplementary Figure 1.** Mapping of reads against genomes of Ruddy turnstone astrovirus.

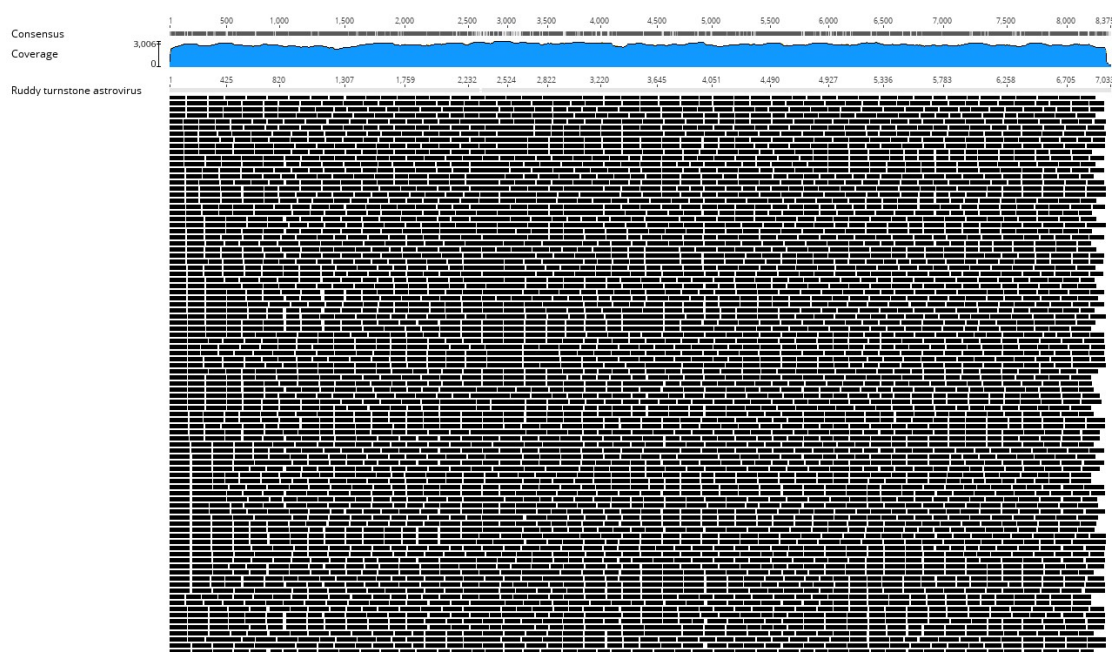

## Supplementary Figure 2. Mapping of reads against genomes of Ruddy turnstone calicivirus.

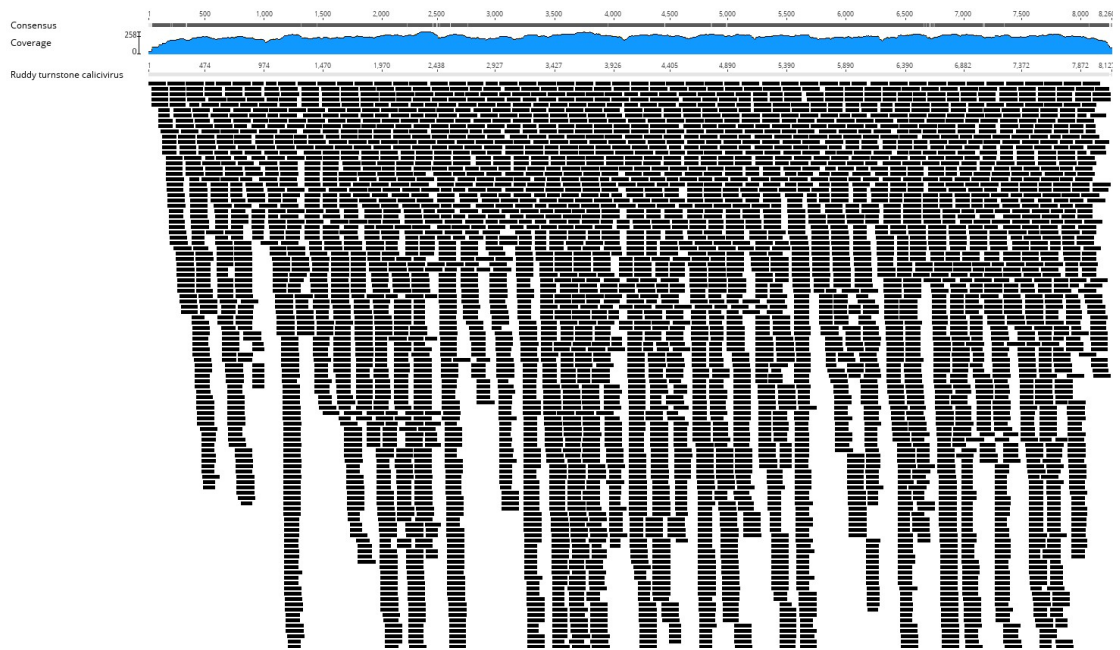

Supplement: 41598_2019_42110_MOESM1_ESM.pdf [file 41598_2019_42110_MOESM1_ESM.pdf]
